# Supplementary material
Source: Springer Nature journal article supplement (https://www.springermedizin.de/resource/supplementary/12935_2012_374_MOESM1_ESM.pdf/9540418)

**A**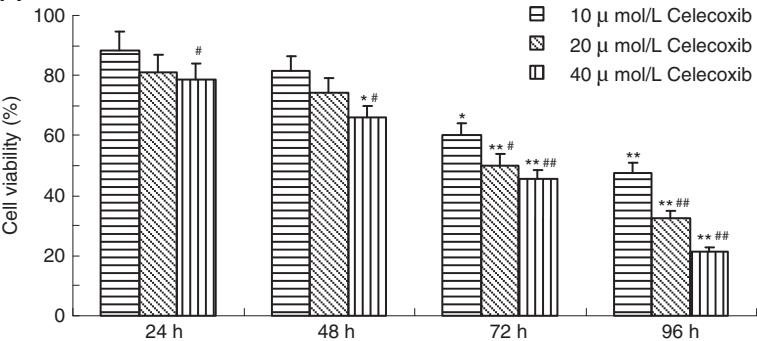**B**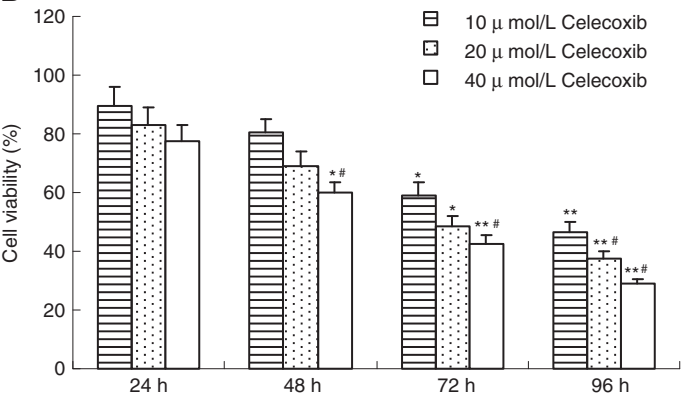

Supplement: MOESM1 [file 9540418]
